# Supplementary material for: Synthesis and self-seeding behavior of oligo(p-phenylene vinylene)-b-poly(N-(2-hydroxypropyl)methacrylamide)
Source: Royal Society of Chemistry journal article supplement (doi:10.1039/c9py00816k), 2019-01-01
Supplement: c9py00816k1.pdf [file c9py00816k1.pdf]

**Supporting Information For**  
**Synthesis and Self-Seeding Behavior of Oligo(*p*-phenylene  
vinylene)-*b*-poly(*N*-(2-hydroxypropyl) methacrylamide)**

*Xian Yang,<sup>a,#</sup> Junyi Ruan,<sup>b,#</sup> Chen Ma,<sup>a</sup> Bingjie Hao,<sup>a</sup> Xiaoyu Huang,<sup>a,\*</sup>*

*Guolin Lu,<sup>a,c</sup> Chun Feng<sup>a,\*</sup>*

<sup>a</sup> Key Laboratory of Synthetic and Self-Assembly Chemistry for Organic Functional Molecules, Center for Excellence in Molecular Synthesis, Shanghai Institute of Organic Chemistry, University of Chinese Academy of Sciences, Chinese Academy of Sciences, 345 Lingling Road, Shanghai 200032, People's Republic of China

<sup>b</sup> School of Materials Science and Engineering, East China University of Science and Technology, 130 Meilong Road, Shanghai 200237, People's Republic of China

<sup>c</sup> State Key Laboratory of Molecular Engineering of Polymers, Department of Macromolecular Science, Fudan University, 220 Handan Road, Shanghai 200433, People's Republic of China

# Both authors contributed equally to this work.

\* To whom correspondence should be addressed, E-mail: cfeng@sioc.ac.cn (Tel: +86-21-54925606, Fax: +86-21-64166128), xyhuang@mail.sioc.ac.cn (Tel: +86-21-54925310, Fax: +86-21-64166128).

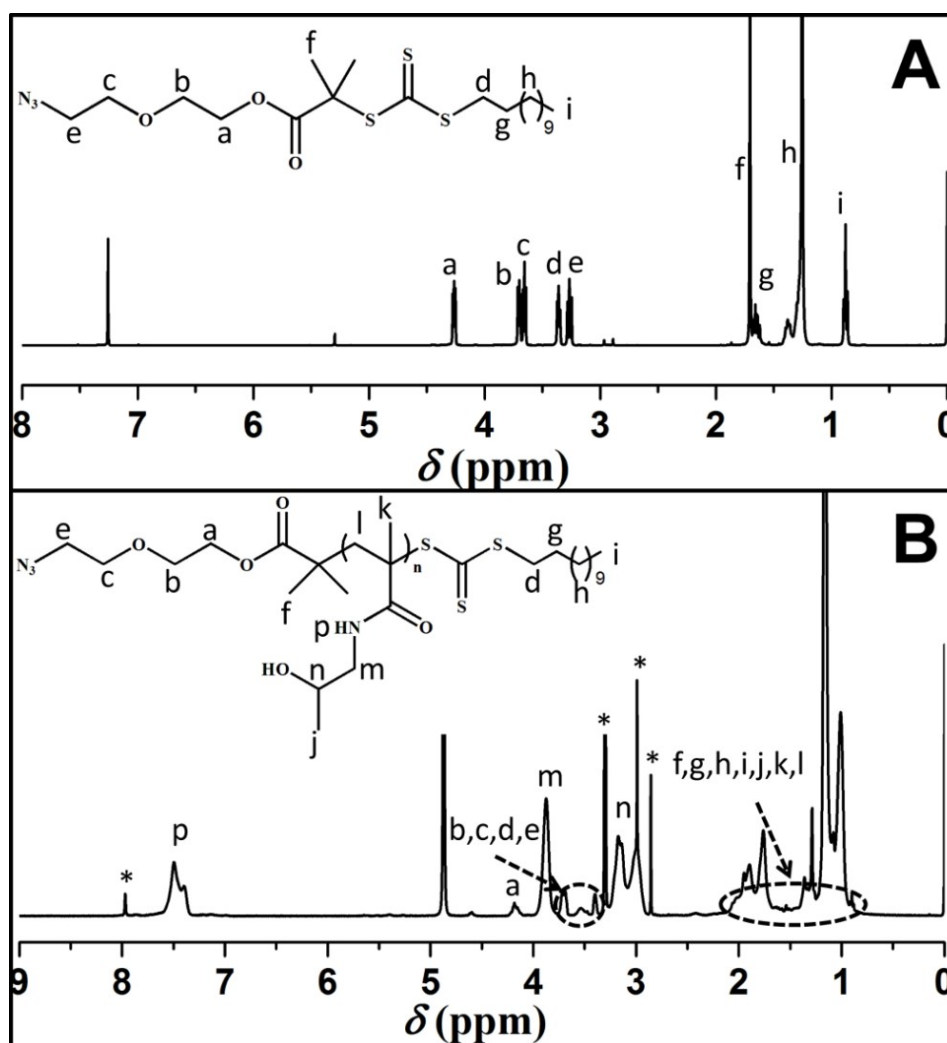

**Figure S1.**  $^1\text{H}$  NMR spectra of (A) azide-containing CTA in  $\text{CDCl}_3$  and (B) azide-terminated PHPMA in  $\text{CD}_3\text{OD}$ . The \* indicates the impurities of DMF and undeuterium  $\text{CH}_3\text{OH}$ . The proton resonance signals assured us of the structure of CTA, showing that the integration area ratio of peaks “a”, “e”, “f” and “i” is 2:2:6:3 (Figure S1A). One can notice that the characteristic signals appeared at 3.87 (peak “m”) and 7.49 (peak “p”) ppm in  $^1\text{H}$  NMR spectrum of PHPMA homopolymer (Figure 1B), which are attributed to  $-\text{CHNHCO}$  and  $-\text{NHCO}$  of PHPMA segment, and typical signals located at 4.18 ppm (peak “a”) was originated from  $-\text{CH}_2\text{OCO}$  of CTA. On the basis of integration area of peaks “a” and “m”, the molecular weight of obtained PHPMA can be estimated.

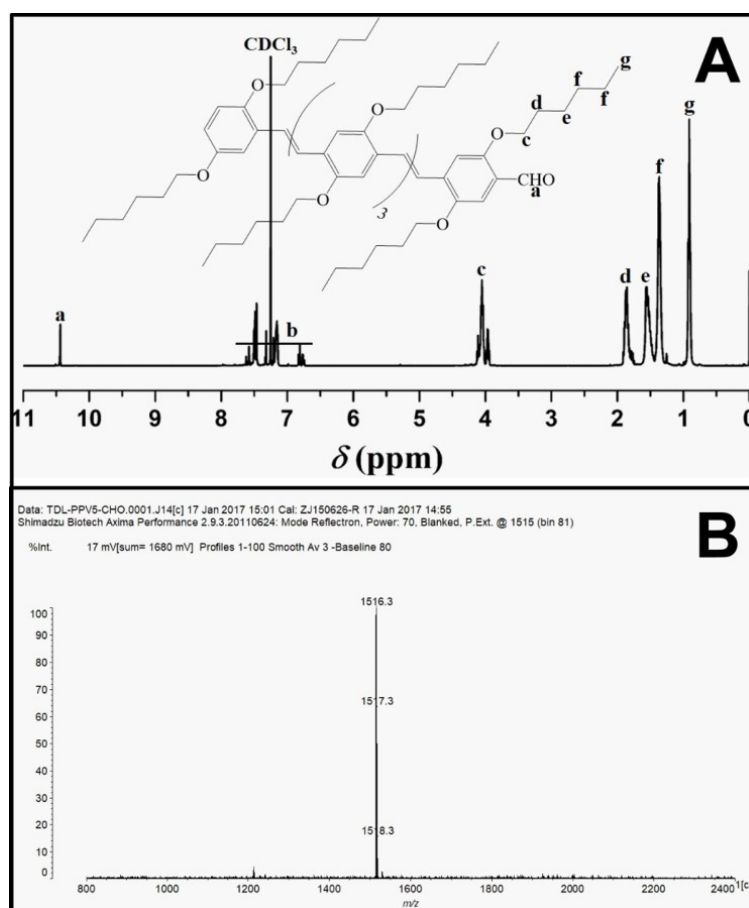

**Figure S2.** (A)  $^1\text{H}$  NMR spectrum of aldehyde-terminated OPV<sub>5</sub> in  $\text{CDCl}_3$ . (B) MALDI-TOF spectrum of aldehyde-terminated OPV<sub>5</sub>.

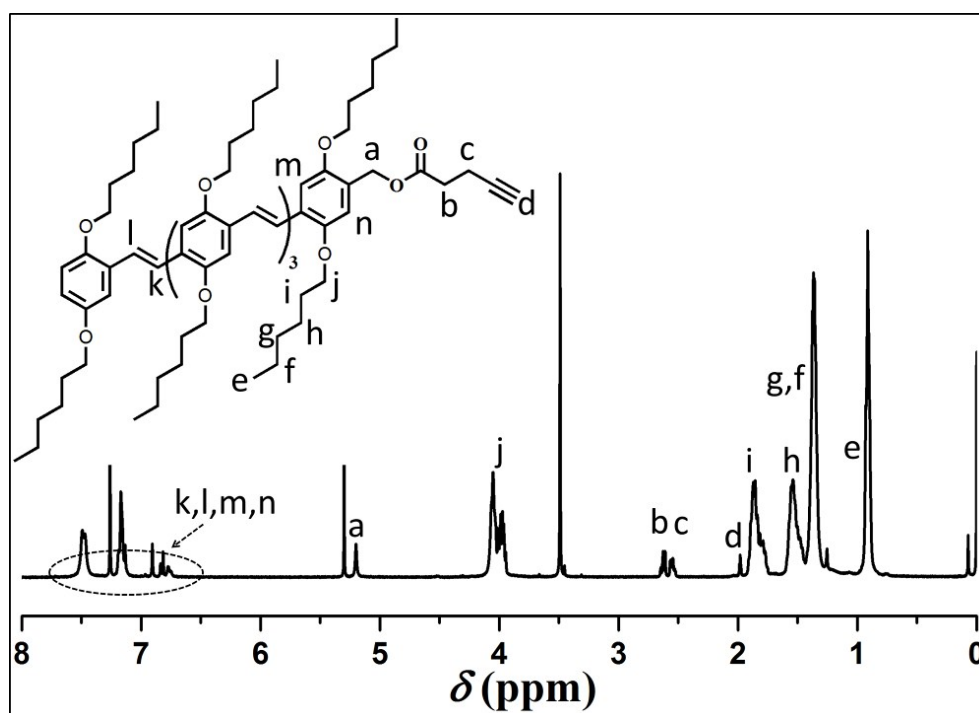

**Figure S3.**  $^1\text{H}$  NMR spectrum of alkyne-terminated OPV<sub>5</sub> in  $\text{CDCl}_3$ .

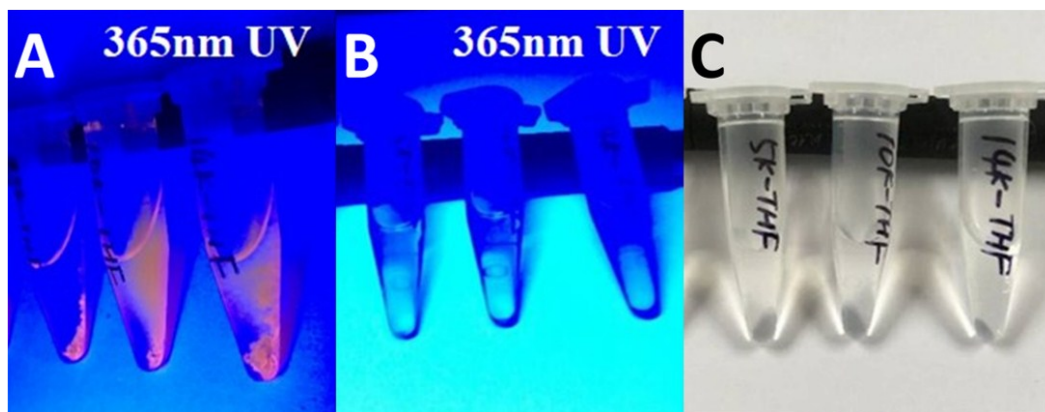

**Figure S4.** (A) THF solutions of OPV<sub>5</sub>-*b*-PHPMA irradiated by 365 nm UV light. (B) THF solutions of OPV<sub>5</sub>-*b*-PHPMA irradiated by 365 nm UV light after filtration through a 0.45 μm filter. (C) THF solutions of OPV<sub>5</sub>-*b*-PHPMA observed in natural light after filtration through a 0.45 μm filter.

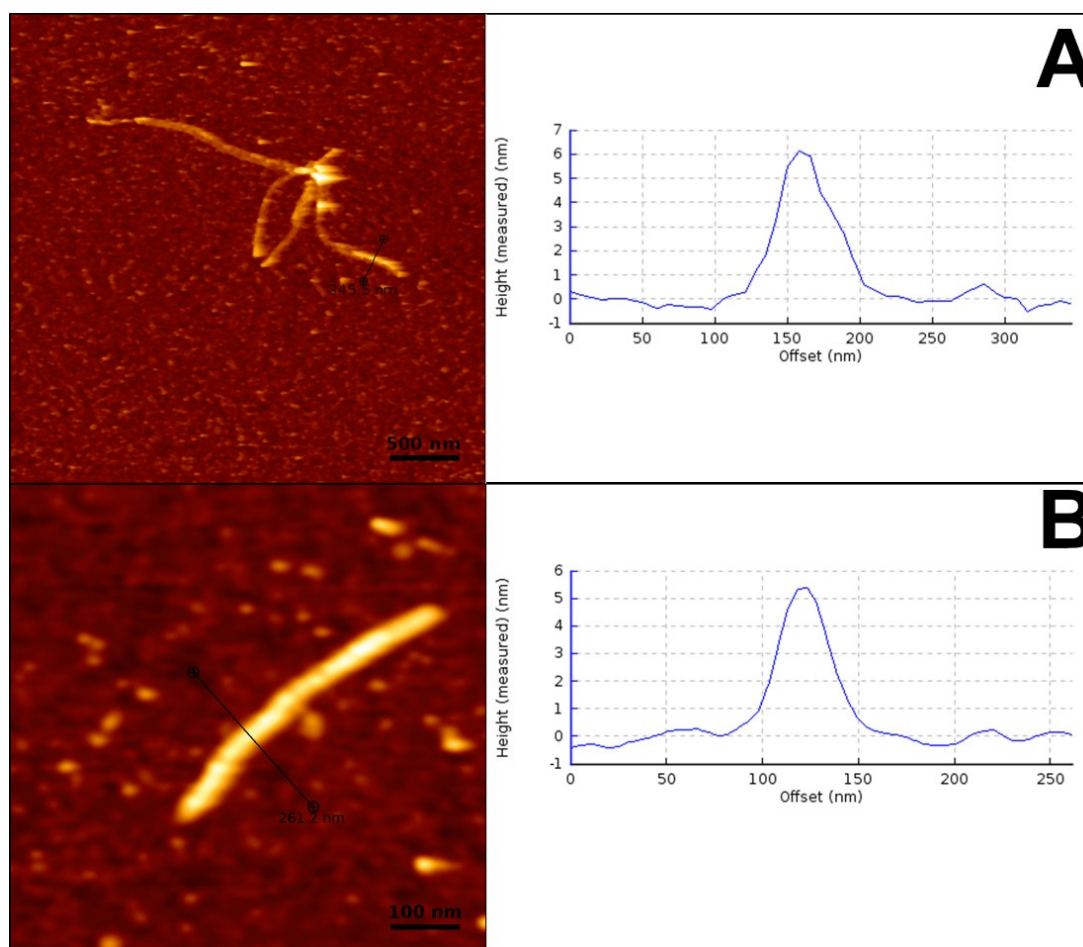

**Figure S5.** AFM images and high profiles of fiber-like micelles of (A) OPV<sub>5</sub>-*b*-PHPMA<sub>71</sub> and (B) OPV<sub>5</sub>-*b*-PHPMA<sub>100</sub>.

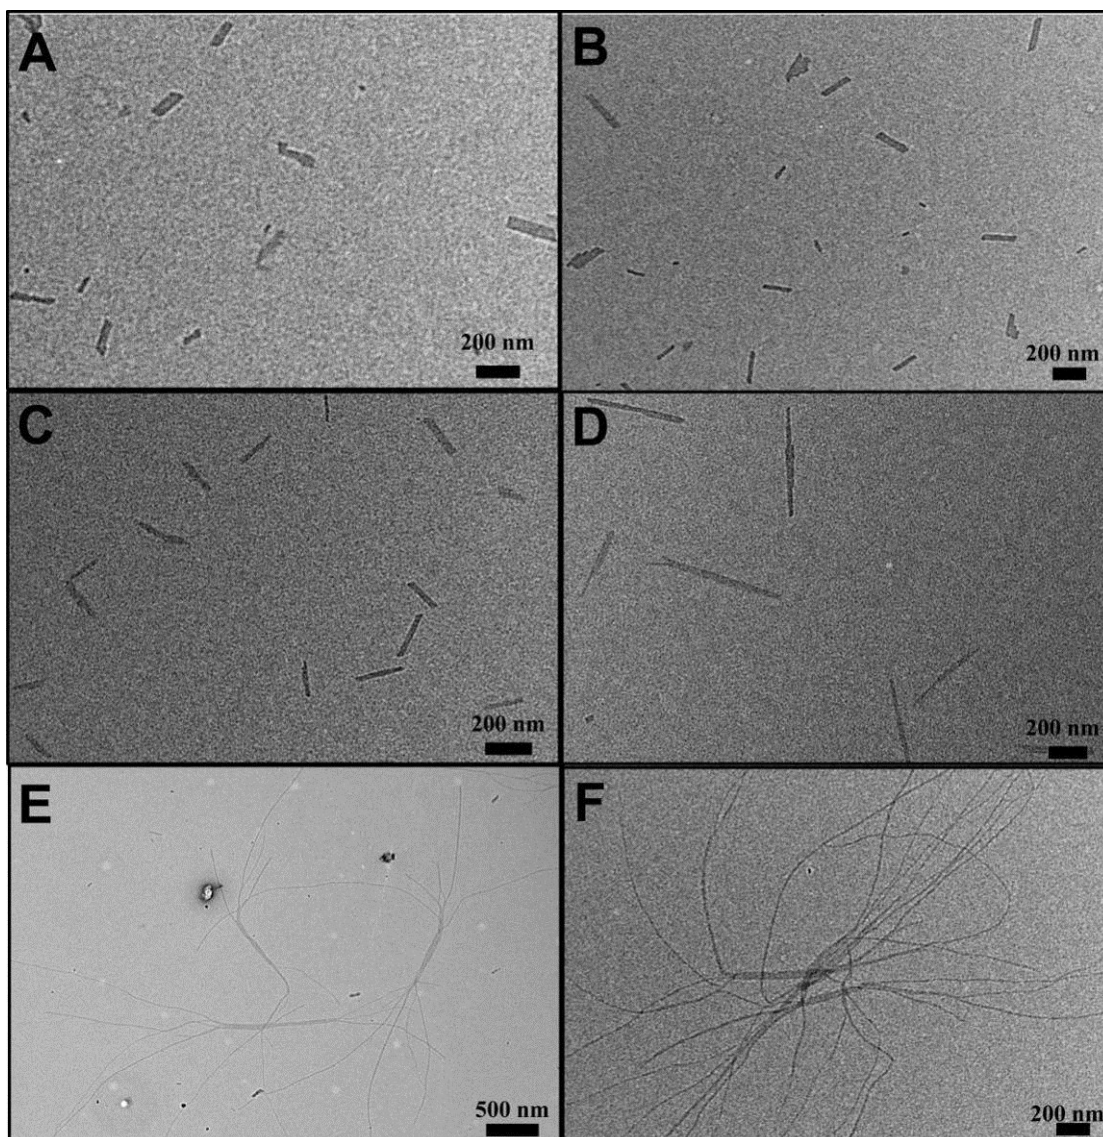

**Figure S6.** TEM images of fiber-like micelles of OPV<sub>5</sub>-*b*-PHPMA<sub>36</sub> obtained by annealing the seeds in ethanol (0.05 mg/mL) at 36°C (A), 40°C (B), 44°C (C), 48°C (D), 60°C (E) and (F).

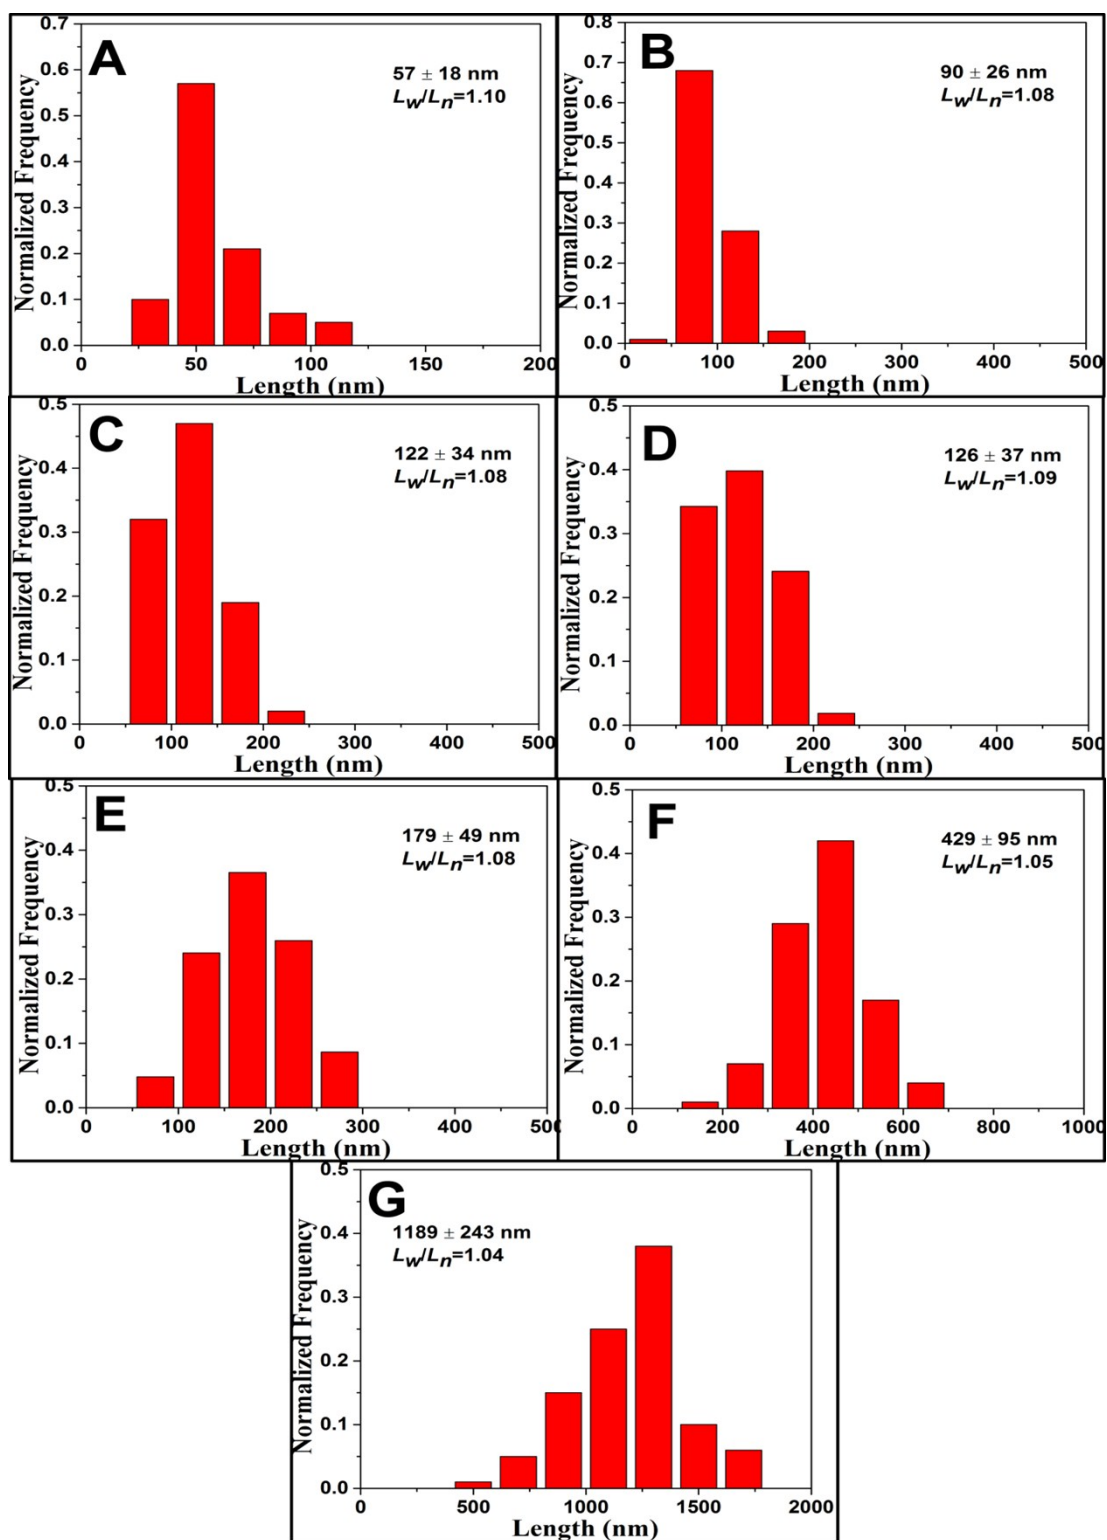

**Figure S7.** Contour length distribution histograms of the seeds of OPV<sub>5</sub>-b-PHPMA<sub>36</sub> (A) in ethanol (0.05 mg/mL) and micelles obtained after annealing the seed solution at 32°C (B), 36°C (C), 40°C (D), 44°C (E), 48°C (F) and 52°C (G) for 30 min, followed by aging at room temperature for 48 h.



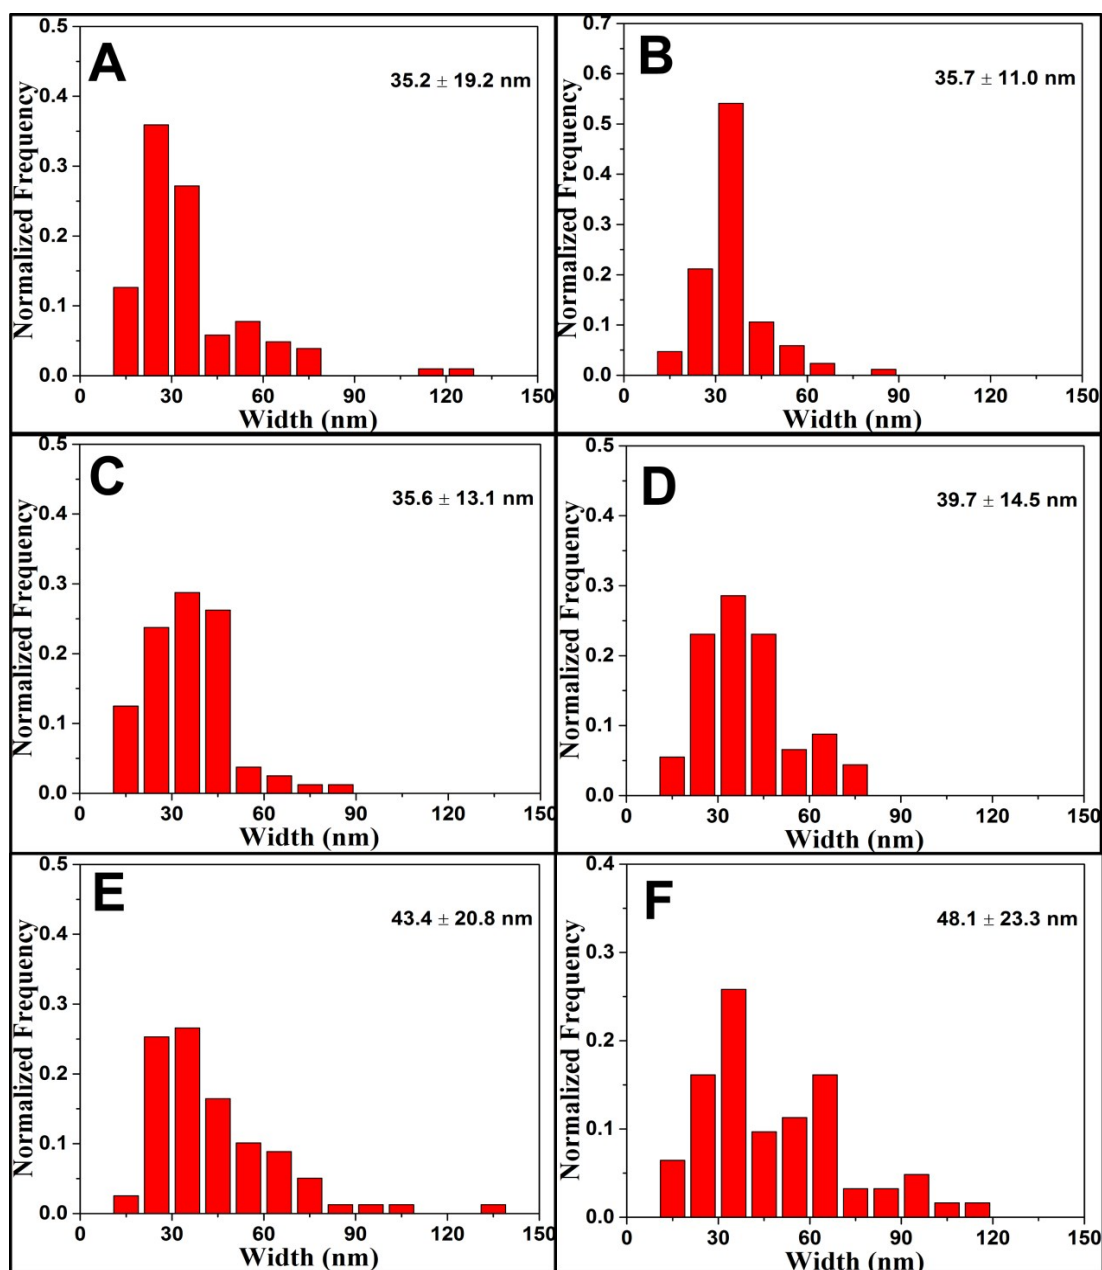

**Figure S8.** Contour width distribution histograms of micelles obtained after annealing the seed solution of OPV<sub>5</sub>-*b*-PHPMA<sub>36</sub> in ethanol (0.05 mg/mL) at 32°C (A), 36°C (B), 40°C (C), 44°C (D), 48°C (E) and 52°C (F) for 30 min, followed by aging at room temperature for 48 h.

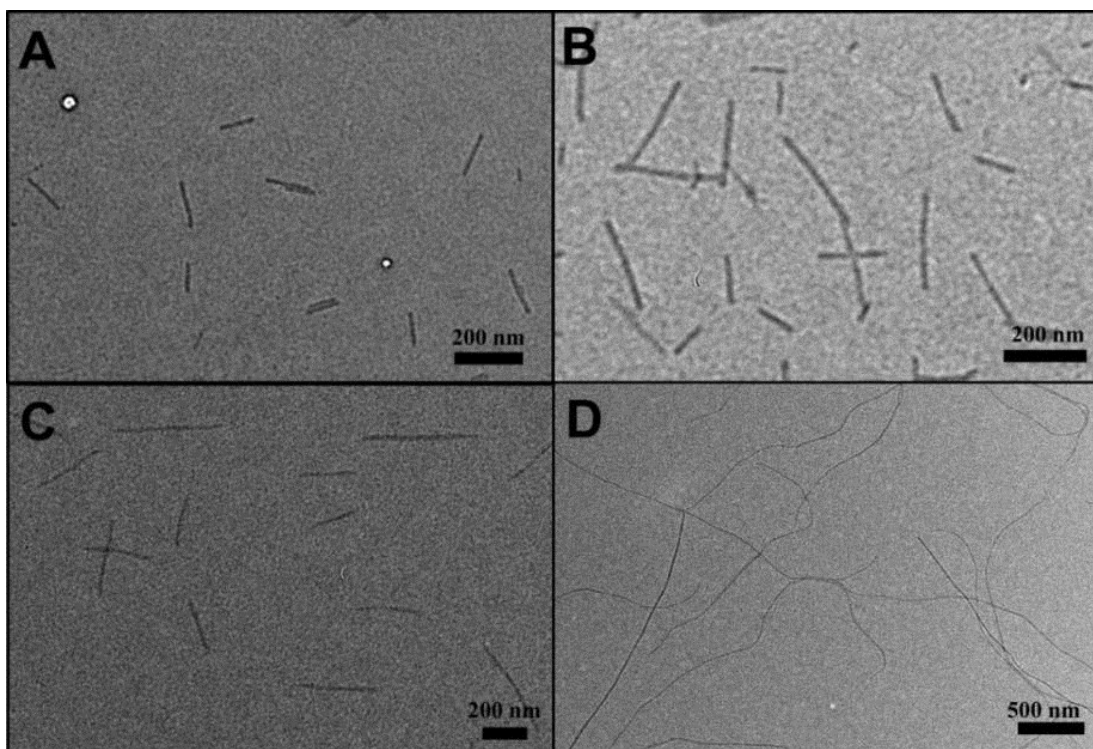

**Figure S9.** TEM images of fiber-like micelles of OPV<sub>5</sub>-*b*-PHPMA<sub>71</sub> obtained by annealing the seeds in ethanol (0.05 mg/mL) at 32°C (A), 36°C (B), 44°C (C) and 55°C (D).



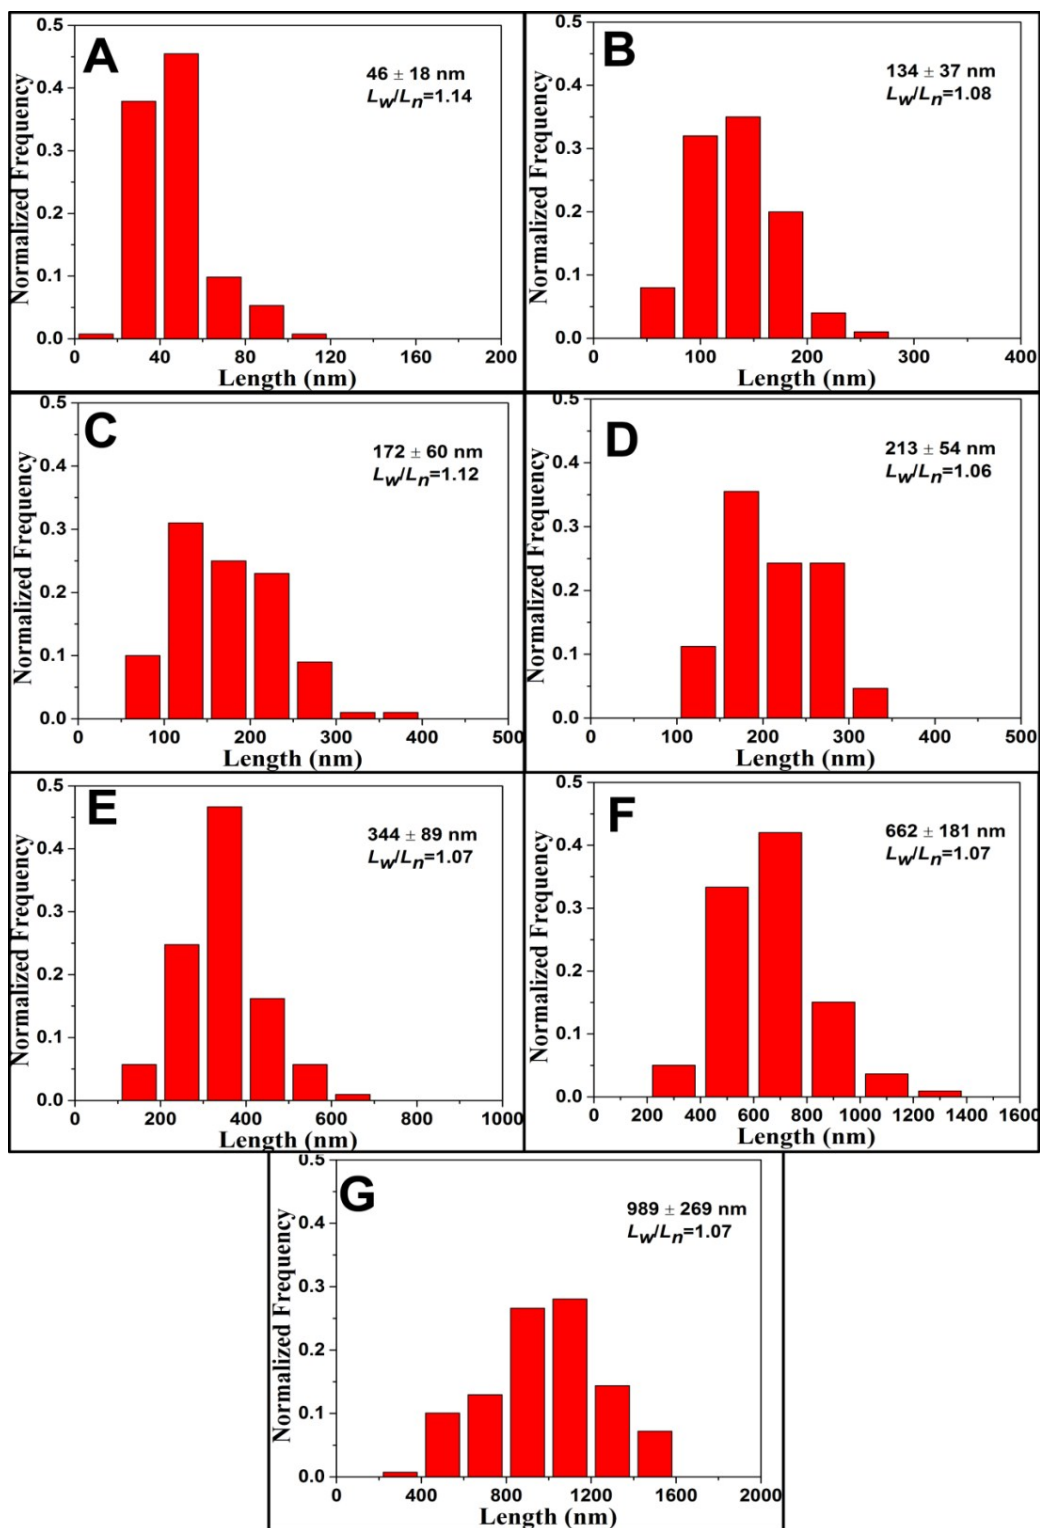

**Figure S10.** Contour length distribution histograms of the seeds of OPV<sub>5</sub>-*b*-PHPMA<sub>71</sub> (A) in ethanol (0.05 mg/mL) and micelles obtained after annealing the seed solution at 32°C (B), 36°C (C), 40°C (D), 44°C (E), 48°C (F) and 50°C (G) for 30 min, followed by aging at room temperature for 48 h.

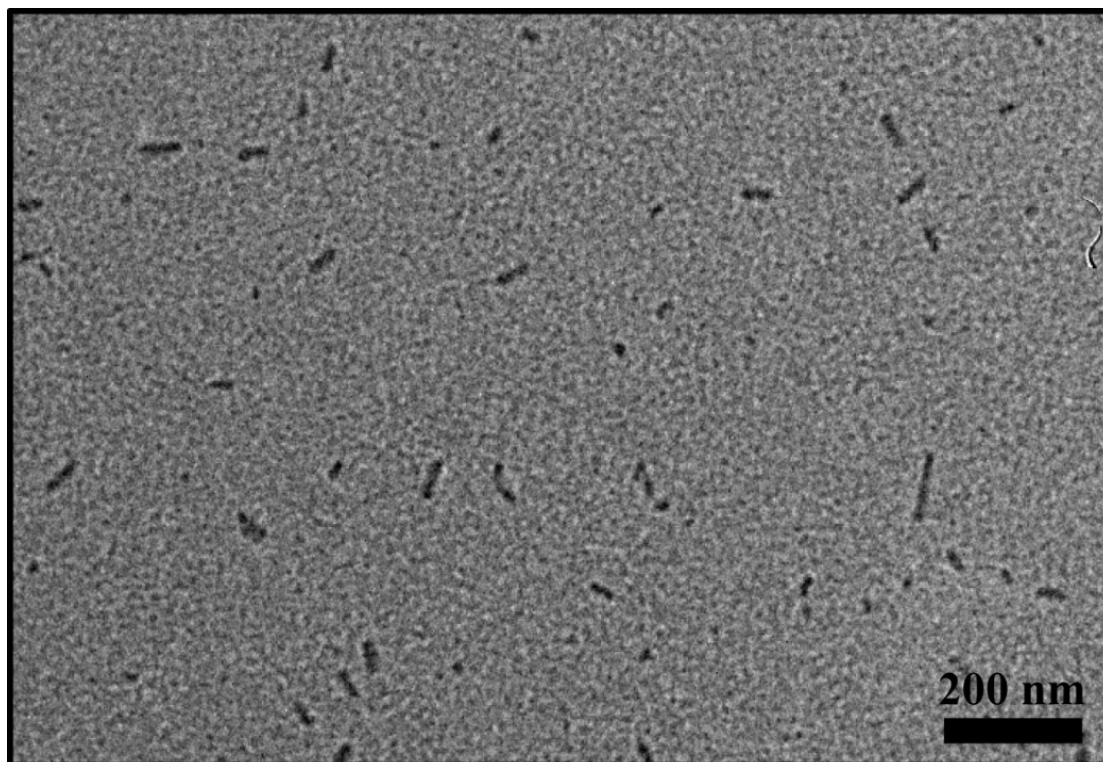

**Figure S11.** TEM image of fiber-like micelles of OPV<sub>5</sub>-*b*-PHPMA<sub>100</sub> obtained by annealing the seeds in ethanol (0.05 mg/mL) at 30°C.

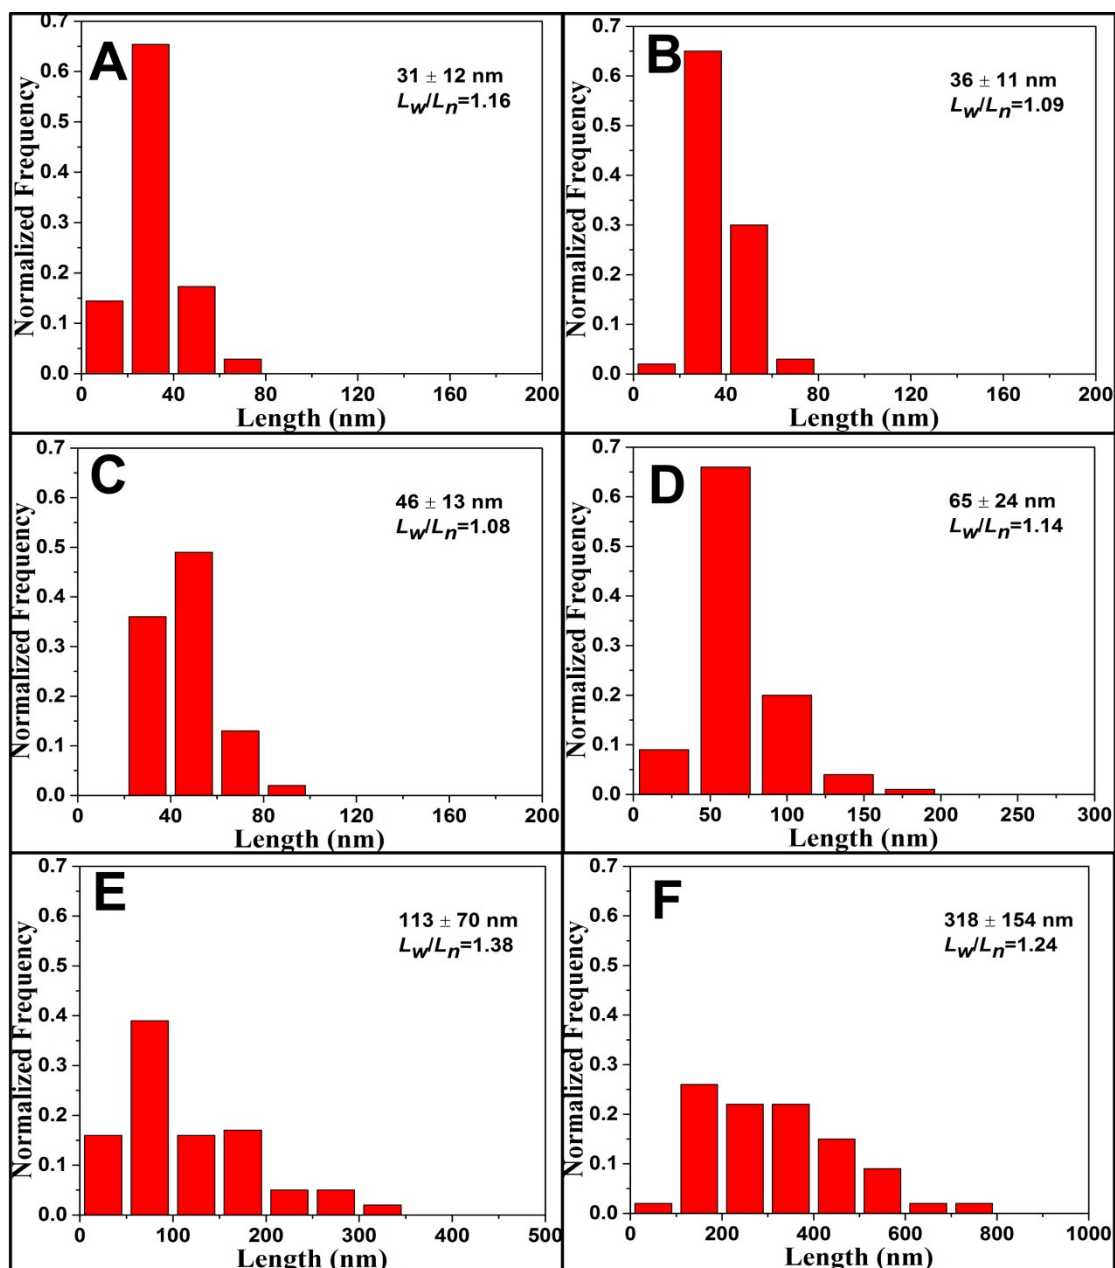

**Figure S12.** Contour length distribution histograms of the seeds of OPV<sub>5</sub>-b-PHPMA<sub>100</sub> (A) in ethanol (0.05 mg/mL) and micelles obtained after annealing the seed solution at 30°C (B), 35°C (C), 40°C (D), 45°C (E) and 55°C (F) for 30 min, followed by aging at room temperature for 48 h.

**Table S1.** Characteristics of seed and fiber-like micelles of OPV<sub>5</sub>-*b*-PHPMA<sub>36</sub> obtained by the self-seeding strategy in ethanol (0.05 mg/mL)<sup>a</sup>

| T (°C) | $L_n$ (nm) | $\sigma$ (nm) <sup>b</sup> | $L_w$ (nm) | $L_w/L_n^b$ | $\sigma/L_n^b$ |
|--------|------------|----------------------------|------------|-------------|----------------|
| 32     | 90         | 26                         | 97         | 1.08        | 0.29           |
| 36     | 122        | 34                         | 132        | 1.08        | 0.28           |
| 40     | 210        | 57                         | 229        | 1.09        | 0.27           |
| 44     | 300        | 79                         | 324        | 1.08        | 0.26           |
| 48     | 429        | 95                         | 450        | 1.05        | 0.22           |
| 52     | 1189       | 243                        | 1237       | 1.04        | 0.20           |

<sup>a</sup> The lengths of fiber-like micelles were measured from their TEM images and the average values were obtained from over 100 readings. <sup>b</sup>  $L_n$ ,  $L_w$  and  $\sigma$  are the number-average micelle length, weight-average micelle length and standard deviations of micelle length distributions, respectively, as calculated from the histograms of length distributions.

**Table S2.** Characteristics of the seed and fiber-like micelles of OPV<sub>5</sub>-*b*-PHPMA<sub>71</sub> obtained by the self-seeding strategy in ethanol (0.05 mg/mL)<sup>a</sup>

| T (°C) | $L_n$ (nm) | $\sigma$ (nm) <sup>b</sup> | $L_w$ (nm) | $L_w/L_n^b$ | $\sigma/L_n^b$ |
|--------|------------|----------------------------|------------|-------------|----------------|
| 32     | 134        | 37                         | 145        | 1.08        | 0.28           |
| 36     | 172        | 60                         | 193        | 1.12        | 0.35           |
| 40     | 213        | 54                         | 226        | 1.06        | 0.25           |
| 44     | 344        | 89                         | 368        | 1.07        | 0.26           |
| 48     | 662        | 181                        | 708        | 1.07        | 0.27           |
| 50     | 989        | 269                        | 1058       | 1.07        | 0.27           |

<sup>a</sup> The lengths of fiber-like micelles were measured from their TEM images and the average values were obtained from over 100 readings. <sup>b</sup>  $L_n$ ,  $L_w$  and  $\sigma$  are the number-average micelle length, weight-average micelle length and standard deviations of micelle length distributions, respectively, as calculated from the histograms of length distributions.

**Table S3.** Characteristics of the seed and fiber-like micelles of OPV<sub>5</sub>-*b*-PHPMA<sub>100</sub> obtained by the self-seeding strategy in ethanol (0.05 mg/mL)<sup>a</sup>

| T (°C) | $L_n$ (nm) | $\sigma$ (nm) <sup>b</sup> | $L_w$ (nm) | $L_w/L_n^b$ | $\sigma/L_n^b$ |
|--------|------------|----------------------------|------------|-------------|----------------|
| 30     | 36         | 11                         | 39         | 1.09        | 0.31           |
| 35     | 46         | 13                         | 57         | 1.24        | 0.28           |
| 40     | 65         | 24                         | 74         | 1.14        | 0.37           |
| 45     | 114        | 70                         | 157        | 1.38        | 0.61           |
| 55     | 318        | 154                        | 394        | 1.24        | 0.48           |

<sup>a</sup> The lengths of fiber-like micelles were measured from their TEM images and the average values were obtained from over 100 readings. <sup>b</sup>  $L_n$ ,  $L_w$  and  $\sigma$  are the number-average micelle length, weight-average micelle length, and standard deviations of micelle length distributions, respectively, as calculated from the histograms of length distributions.
